# Supplementary material for: Characterization of intratumoral tertiary lymphoid structures in pancreatic ductal adenocarcinoma: cellular properties and prognostic significance
Source: PubMed Central journal article supplement — J Immunother Cancer. 2023 Jun 26;11(6):e006698. doi: 10.1136/jitc-2023-006698 (PMC10410893; doi:10.1136/jitc-2023-006698), 2023-06-26

**Table S1. Clinicopathologic features of PDAC patients enrolled for analyses.**

|                          | <b>Surgery Alone Group</b> | <b>Neoadjuvant Treatment Group</b> |
|--------------------------|----------------------------|------------------------------------|
| <b>Total</b>             | 380                        | 136                                |
| <b>Age</b>               |                            |                                    |
| ≤60                      | 179(47.1%)                 | 73(53.7%)                          |
| >60                      | 201(52.9%)                 | 63(46.3%)                          |
| <b>Gender</b>            |                            |                                    |
| Male                     | 216(56.8%)                 | 70(51.5%)                          |
| Female                   | 164(43.2%)                 | 66(48.5%)                          |
| <b>TNM Stage</b>         |                            |                                    |
| I                        | 108(28.4%)                 | 33(24.3%)                          |
| II                       | 149(39.2%)                 | 54(39.7%)                          |
| III                      | 119(31.3%)                 | 47(34.6%)                          |
| Unknown                  | 4(1.1%)                    | 2(1.5%)                            |
| <b>T</b>                 |                            |                                    |
| T1/T2                    | 199(52.4%)                 | 78(57.4%)                          |
| T3                       | 181(47.6%)                 | 56(41.2%)                          |
| Unknown                  | 0(1.1%)                    | 2(1.5%)                            |
| <b>N</b>                 |                            |                                    |
| N0                       | 184(48.4%)                 | 65(47.8%)                          |
| N1/N2                    | 196(51.6%)                 | 69(50.7%)                          |
| Unknown                  | 0(0.0%)                    | 2(1.5%)                            |
| <b>Grade</b>             |                            |                                    |
| G1/2                     | 221(58.2%)                 | 83(61.0%)                          |
| G3                       | 159(41.8%)                 | 50(36.8%)                          |
| Unknown                  | 0(0.0%)                    | 3(2.2%)                            |
| <b>Tumor Location</b>    |                            |                                    |
| Head                     | 199(52.4%)                 | 49(36.0%)                          |
| Body/Tail                | 171(45.0%)                 | 86(63.2%)                          |
| Unknown                  | 10(2.6%)                   | 1(0.7%)                            |
| <b>Nerve Invasion</b>    |                            |                                    |
| No                       | 75(19.7%)                  | 10(7.4%)                           |
| Yes                      | 301(79.2%)                 | 125(91.9%)                         |
| Unknown                  | 4(1.1%)                    | 1(0.7%)                            |
| <b>Vascular Invasion</b> |                            |                                    |
| No                       | 286(75.3%)                 | 84(61.8%)                          |
| Yes                      | 81(21.3%)                  | 51(37.5%)                          |
| Unknown                  | 13(3.4%)                   | 1(0.7%)                            |

TNM stage: tumor-node-metastasis staging system (AJCC 8<sup>th</sup> edition); presented as number (percentage).

**Table S2. Detailed information of antibodies used in mIHC analyses.**

| <b>Antibody</b> | <b>Source</b>          | <b>Antigen retrieval condition</b> | <b>Concentration</b> |
|-----------------|------------------------|------------------------------------|----------------------|
| CD4             | Abcam(ab133616)        | pH 9.0                             | 1/200                |
| CD8             | Abcam(ab178089)        | pH 9.0                             | 1/100                |
| CD20            | Abcam(ab64088)         | pH 6.0                             | 1/100                |
| CD21            | Abcam(ab227668)        | pH 6.0                             | 1/100                |
| CD23            | Abcam(ab254162)        | pH 9.0                             | 1/100                |
| FOXP3           | Cell Signaling(98377s) | pH 9.0                             | 1/100                |
| CD68            | Abcam(ab955)           | pH 9.0                             | 1/1000               |
| CD11c           | Abcam(ab52632)         | pH 9.0                             | 1/200                |
| CD15            | Abcam(ab241552)        | pH 6.0                             | 1/100                |
| CD45RO          | Abcam(ab23)            | pH 6.0                             | 1/100                |
| CD69            | Abcam(ab233396)        | pH 9.0                             | 1/500                |
| CD30            | Abcam(ab134080)        | pH 9.0                             | 1/1000               |
| HLA-DR          | Abcam(ab20181)         | pH 6.0                             | 1/100                |
| CD25            | Abcam(ab128955)        | pH 9.0                             | 1/100                |
| CD28            | Abcam(ab243228)        | pH 9.0                             | 1/1000               |
| CD80            | Abcam(ab134120)        | pH 9.0                             | 1/1000               |
| CD86            | Abcam(ab239075)        | pH 9.0                             | 1/100                |
| OX40            | Abcam(ab229021)        | pH 9.0                             | 1/1000               |
| OX40L           | Cell Signaling(59036)  | pH 9.0                             | 1/200                |
| CTLA-4          | Abcam(ab237712)        | pH 9.0                             | 1/500                |
| PD-1            | Abcam(ab52587)         | pH 6.0                             | 1/50                 |
| TIM-3           | Abcam(ab241332)        | pH 9.0                             | 1/1000               |
| LAG-3           | Abcam(ab209236)        | pH 9.0                             | 1/1000               |

**Table S3. Clinicopathologic features of PDAC patients in the external validation cohort.**

|                          | External validation cohort | Chi-Square test P-value<br>(versus the SA group) |
|--------------------------|----------------------------|--------------------------------------------------|
| <b>Total</b>             | 123                        |                                                  |
| <b>Age</b>               |                            |                                                  |
| ≤60                      | 56(45.5%)                  | 0.761                                            |
| >60                      | 67(54.5%)                  |                                                  |
| <b>Gender</b>            |                            |                                                  |
| Male                     | 82(66.7%)                  | 0.054                                            |
| Female                   | 41(33.3%)                  |                                                  |
| <b>TNM Stage</b>         |                            |                                                  |
| I                        | 42(34.1%)                  | 0.055                                            |
| II                       | 56(45.5%)                  |                                                  |
| III                      | 25(20.3%)                  |                                                  |
| <b>T</b>                 |                            |                                                  |
| T1/T2                    | 71(57.7%)                  | 0.300                                            |
| T3/T4                    | 52(42.3%)                  |                                                  |
| <b>N</b>                 |                            |                                                  |
| N0                       | 73(59.3%)                  | 0.035                                            |
| N1/N2                    | 50(40.7%)                  |                                                  |
| <b>Grade</b>             |                            |                                                  |
| G1/2                     | 73(59.3%)                  | 0.816                                            |
| G3                       | 50(40.7%)                  |                                                  |
| <b>Tumor Location</b>    |                            |                                                  |
| Head                     | 68(55.3%)                  | 0.772                                            |
| Body/Tail                | 55(44.7%)                  |                                                  |
| <b>Nerve Invasion</b>    |                            |                                                  |
| No                       | 12(9.8%)                   | 0.012                                            |
| Yes                      | 109(88.6%)                 |                                                  |
| Unknown                  | 2(1.6%)                    |                                                  |
| <b>Vascular Invasion</b> |                            |                                                  |
| No                       | 98(79.7%)                  | 0.175                                            |
| Yes                      | 19(15.4%)                  |                                                  |
| Unknown                  | 6(4.9%)                    |                                                  |

**Table S4. Clinicopathologic features of PDAC patients with intratumoral TLSs in the SA and NAT group.**

|                          | SA group         |                   |            | Chi-square test P-value | NAT group        |                   |            | Chi-square test P-value |
|--------------------------|------------------|-------------------|------------|-------------------------|------------------|-------------------|------------|-------------------------|
|                          | TLS (+)          | TLS (-)           | Total      |                         | TLS (+)          | TLS (-)           | Total      |                         |
| <b>Number</b>            | <b>80(21.1%)</b> | <b>300(78.9%)</b> | <b>380</b> |                         | <b>21(15.4%)</b> | <b>115(84.6%)</b> | <b>136</b> |                         |
| <b>Age</b>               |                  |                   |            | 0.353                   |                  |                   |            | 0.897                   |
| ≤60                      | 34(8.9%)         | 145(38.2%)        | 179        |                         | 11(8.1%)         | 62(45.6%)         | 73         |                         |
| >60                      | 46(12.1%)        | 155(40.8%)        | 201        |                         | 10(7.4%)         | 53(39.0%)         | 63         |                         |
| <b>Gender</b>            |                  |                   |            | 0.894                   |                  |                   |            | 0.928                   |
| Male                     | 46(12.1%)        | 170(44.7%)        | 216        |                         | 11(8.1%)         | 59(43.4%)         | 70         |                         |
| Female                   | 34(8.9%)         | 130(34.2%)        | 164        |                         | 10(7.4%)         | 56(41.2%)         | 66         |                         |
| <b>TNM Stage</b>         |                  |                   |            | 0.688                   |                  |                   |            | 0.689                   |
| I                        | 26(6.8%)         | 82(21.6%)         | 108        |                         | 7(5.1%)          | 26(19.1%)         | 33         |                         |
| II                       | 32(8.4%)         | 117(30.8%)        | 149        |                         | 7(5.1%)          | 47(34.6%)         | 54         |                         |
| III                      | 21(5.5%)         | 98(25.8%)         | 119        |                         | 7(5.1%)          | 40(29.4%)         | 47         |                         |
| Unknown                  | 1(0.3%)          | 3(0.8%)           | 4          |                         | 0(0.0%)          | 2(1.5%)           | 2          |                         |
| <b>T</b>                 |                  |                   |            | 0.079                   |                  |                   |            | 0.697                   |
| T1/T2                    | 49(12.9%)        | 150(39.5%)        | 199        |                         | 11(8.1%)         | 67(49.3%)         | 78         |                         |
| T3                       | 31(8.2%)         | 150(39.5%)        | 181        |                         | 10(7.4%)         | 46(33.8%)         | 56         |                         |
| Unknown                  | 0(0.0%)          | 0(0.0%)           | 0          |                         | 0(0.0%)          | 2(1.5%)           | 2          |                         |
| <b>N</b>                 |                  |                   |            | 0.947                   |                  |                   |            | 0.770                   |
| N0                       | 39(10.3%)        | 145(38.2%)        | 184        |                         | 11(8.1%)         | 54(39.7%)         | 65         |                         |
| N1/N2                    | 41(10.8%)        | 155(40.8%)        | 196        |                         | 10(7.4%)         | 59(43.4%)         | 69         |                         |
| Unknown                  | 0(0.0%)          | 0(0.0%)           | 0          |                         | 0(0.0%)          | 2(1.5%)           | 2          |                         |
| <b>Grade</b>             |                  |                   |            | 0.308                   |                  |                   |            | 0.755                   |
| G1/2                     | 51(13.4%)        | 170(44.7%)        | 221        |                         | 13(9.6%)         | 70(51.5%)         | 83         |                         |
| G3                       | 29(7.6%)         | 130(34.2%)        | 159        |                         | 8(5.9%)          | 42(30.9%)         | 50         |                         |
| Unknown                  | 0(0.0%)          | 0(0.0%)           | 0          |                         | 0(0.0%)          | 3(2.2%)           | 3          |                         |
| <b>Tumor Location</b>    |                  |                   |            | 0.224                   |                  |                   |            | 0.660                   |
| Head                     | 45(11.8%)        | 154(40.5%)        | 199        |                         | 6(4.4%)          | 43(31.6%)         | 49         |                         |
| Body/Tail                | 35(9.2%)         | 136(35.8%)        | 171        |                         | 15(11.0%)        | 71(52.2%)         | 86         |                         |
| Unknown                  | 0(0.0%)          | 10(2.6%)          | 10         |                         | 0(0.0%)          | 1(0.7%)           | 1          |                         |
| <b>Nerve Invasion</b>    |                  |                   |            | 0.163                   |                  |                   |            | 0.335                   |
| No                       | 21(5.5%)         | 54(14.2%)         | 75         |                         | 0(0.0%)          | 10(7.4%)          | 10         |                         |
| Yes                      | 59(15.5%)        | 242(63.7%)        | 301        |                         | 21(15.4%)        | 104(76.5%)        | 125        |                         |
| Unknown                  | 0(0.0%)          | 4(1.1%)           | 4          |                         | 0(0.0%)          | 1(0.7%)           | 1          |                         |
| <b>Vascular Invasion</b> |                  |                   |            | 0.514                   |                  |                   |            | 0.578                   |
| No                       | 62(16.3%)        | 224(58.9%)        | 286        |                         | 13(9.6%)         | 71(52.2%)         | 84         |                         |
| Yes                      | 17(4.5%)         | 64(16.8%)         | 81         |                         | 8(5.9%)          | 43(31.6%)         | 51         |                         |
| Unknown                  | 1(0.3%)          | 12(3.2%)          | 13         |                         | 0(0.0%)          | 1(0.7%)           | 1          |                         |
| <b>Therapy</b>           |                  |                   |            |                         |                  |                   |            | 0.143                   |

---

|            |          |           |    |
|------------|----------|-----------|----|
| AG         | 12(8.8%) | 75(55.1%) | 87 |
| GS         | 6(4.4%)  | 16(11.8%) | 22 |
| GEMOX      | 1(0.7%)  | 20(14.7%) | 21 |
| FOLFIRINOX | 2(1.5%)  | 3(2.2%)   | 5  |
| Other      | 0(0.0%)  | 1(0.7%)   | 1  |

---

TNM stage: tumor-node-metastasis staging system (AJCC 8<sup>th</sup> edition); T: primary tumor, N: regional lymph node, M: distant metastasis.

**Figure S1.** Representative H&E staining images of intratumoural (left) and peritumoural (right) TLS in PDAC; TLSs are indicated by red arrows.

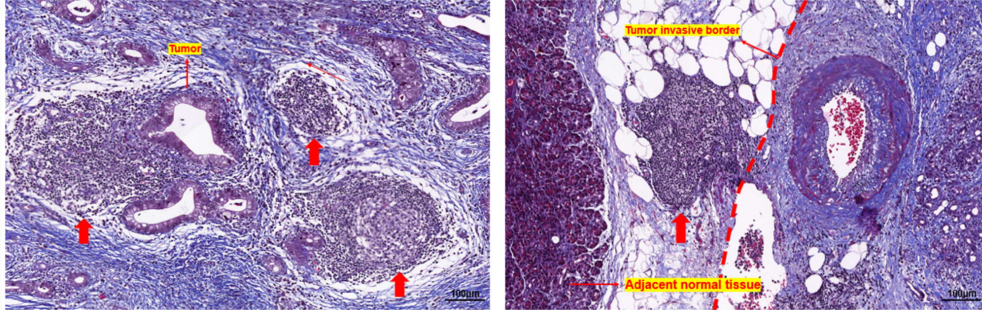

**Figure S2.** Representative brightfield mIHC images comparing infiltration levels of several other immune cells; TLSs are circled with dotted red lines; red arrows indicate the examples of positively stained cells; scale bar: 100  $\mu$ m.

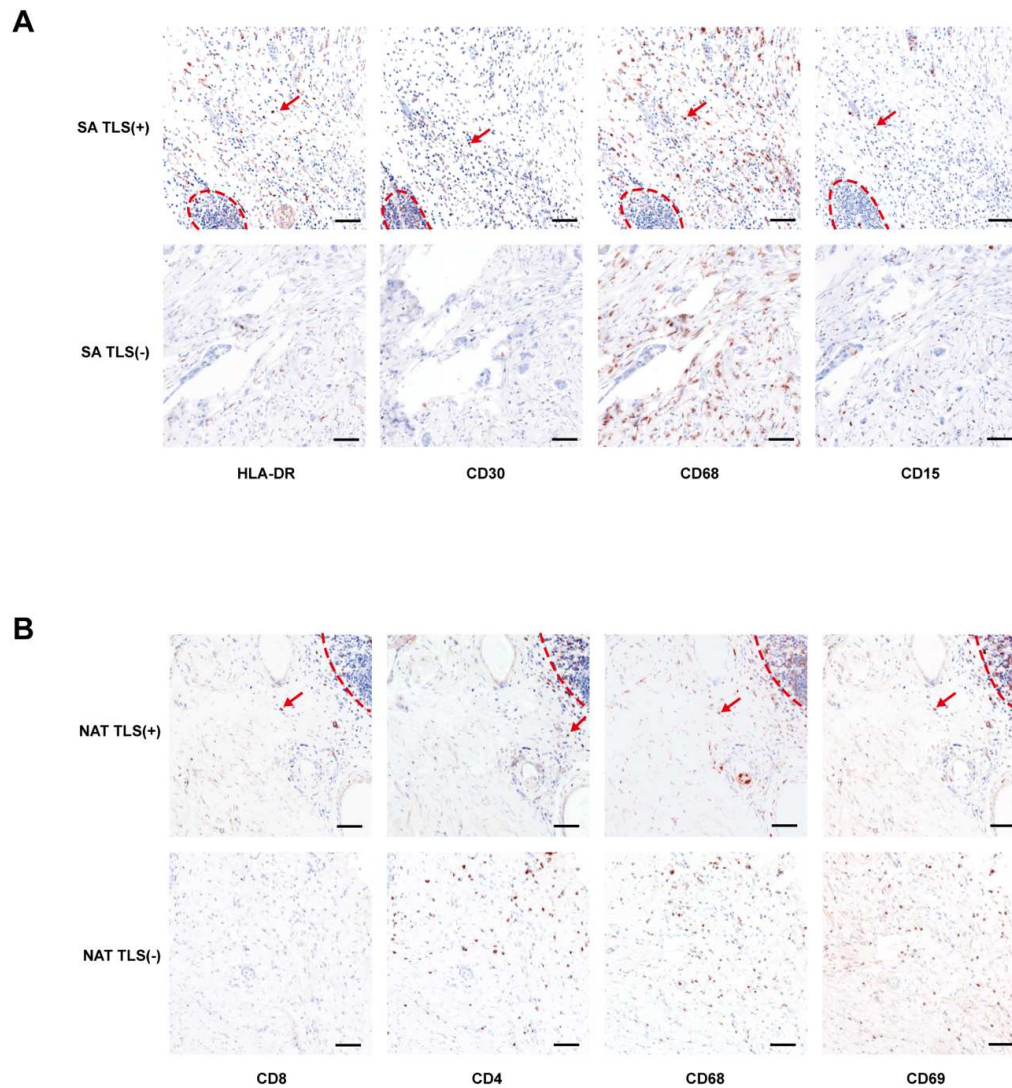

**Figure S3.** Kaplan–Meier curves comparing OS and PFS probabilities between TLS (+) and TLS (-) patients receiving different NAT therapies.

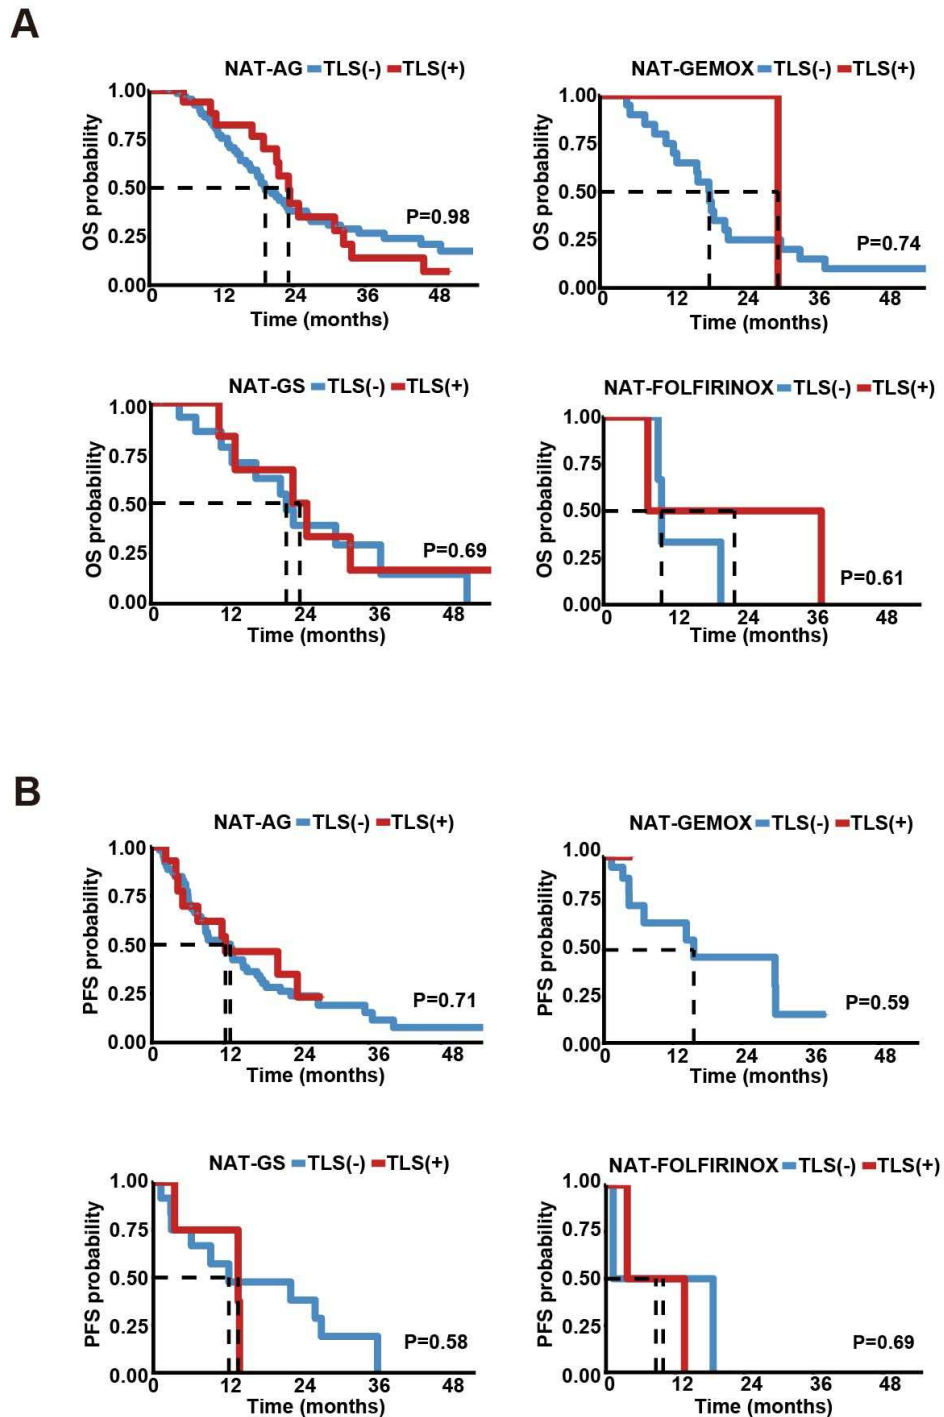



**Figure S4.** Frequency and prognostic value of TLS location and maturation in the SA cohort; peri-TLS: peritumoural TLS, intra-TLS: intratumoural TLS; eTLS group: eTLS(+) pTLS(-) sTLS(-) samples, pTLS group: pTLS(+) sTLS(-) samples, sTLS group: sTLS(+) samples.

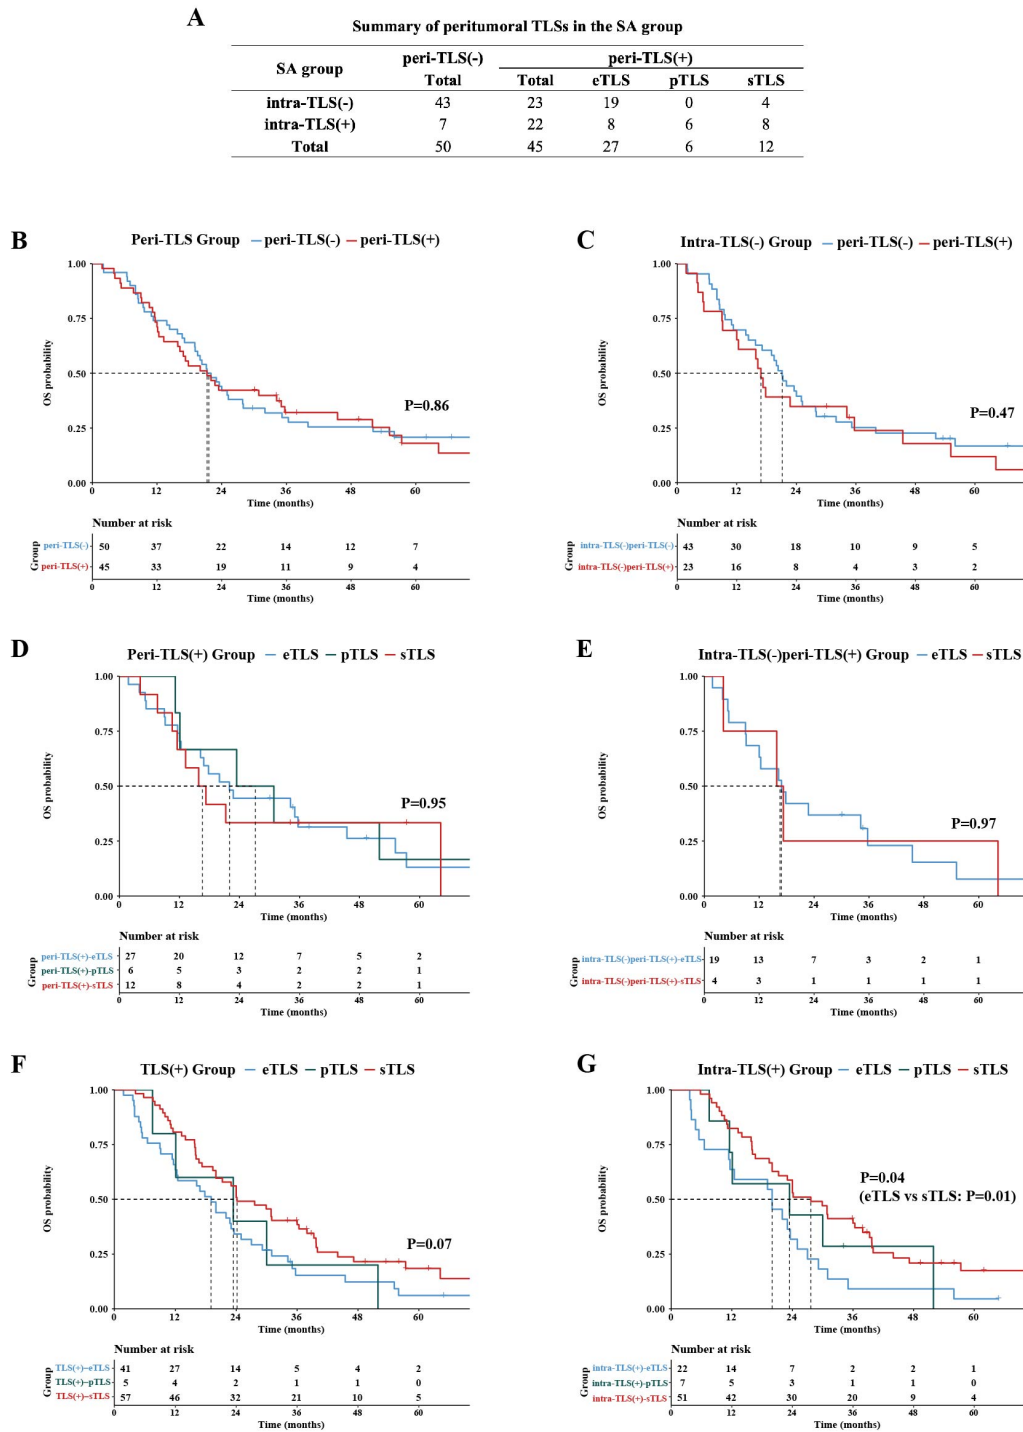

**Figure S5.** Frequency and prognostic value of TLS location and maturation in the NAT cohort; peri-TLS: peritumoural TLS, intra-TLS: intratumoural TLS; eTLS group: eTLS(+) pTLS(-) sTLS(-) samples, pTLS group: pTLS(+) sTLS(-) samples, sTLS group: sTLS(+) samples.

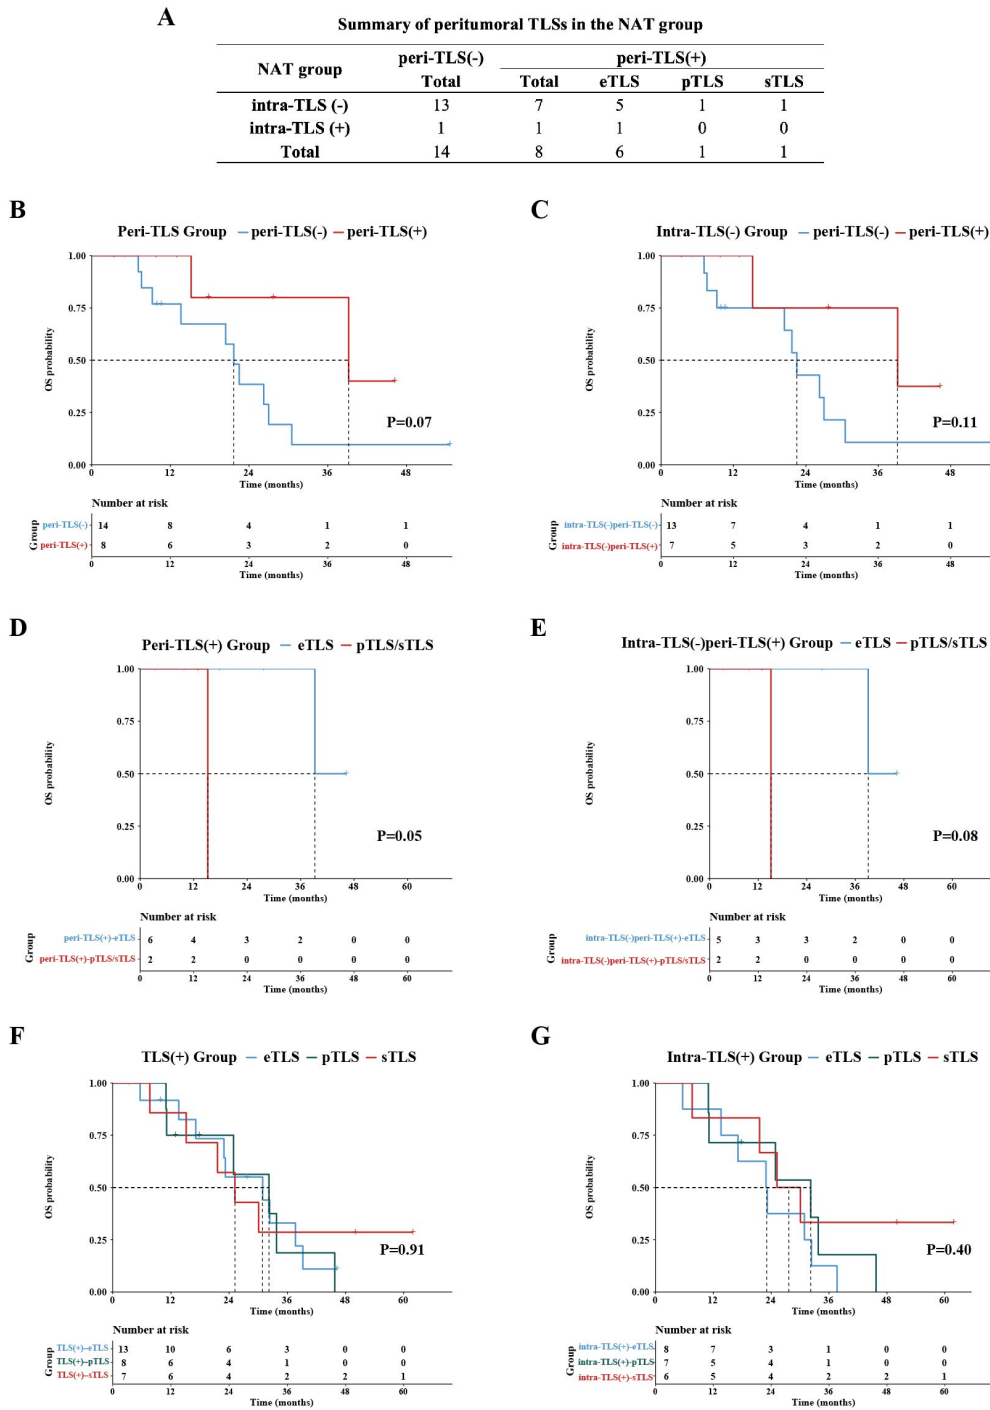

**Figure S6.** Representative mIHC images showing the expression levels of activation markers, costimulation molecules and inhibitory molecules within intratumoral TLSs in the SA and NAT group; TLSs are circled with dotted white lines; scale bar: 50  $\mu$ m.

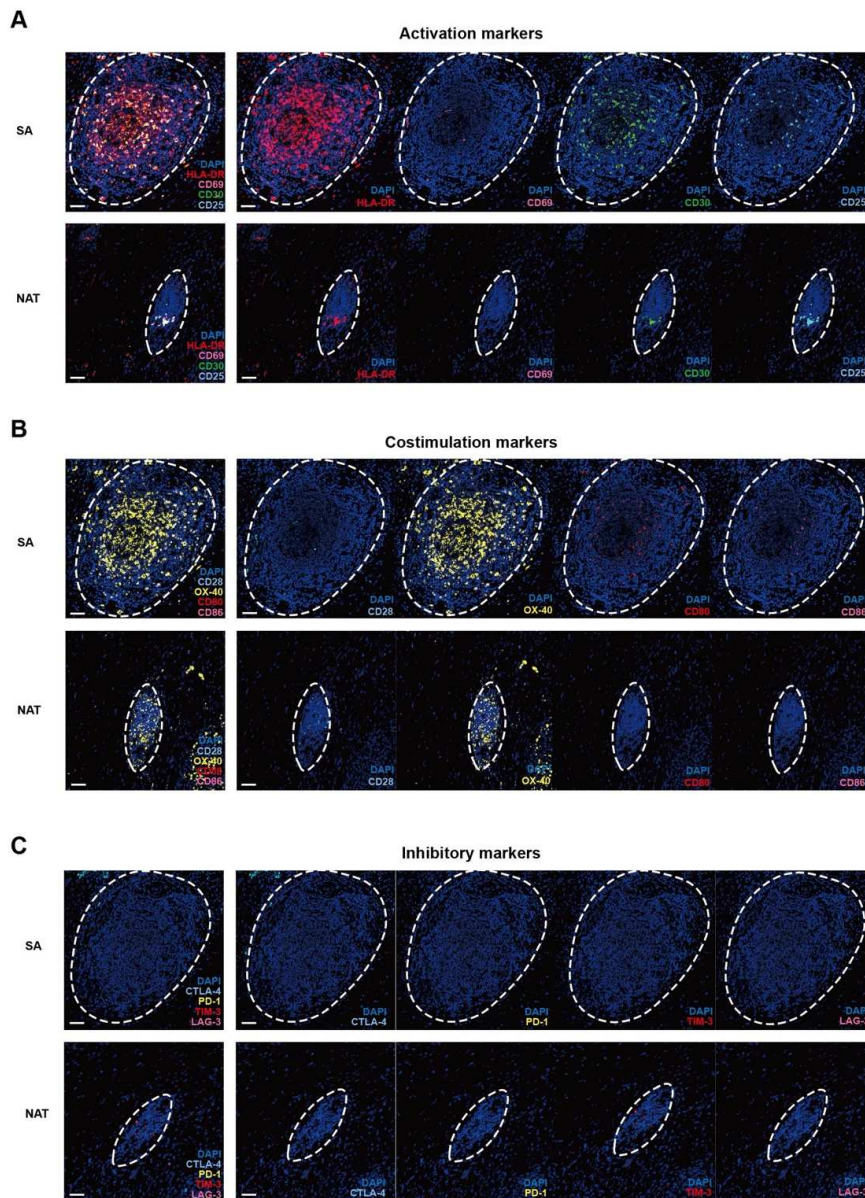

Supplement: jitc-2023-006698supp001.pdf [file jitc-2023-006698supp001.pdf]
